# Supplementary material for: Coordination polymers based on the octamolybdate and flexible bis(triazole) ligands with different spacer lengths
Source: Royal Society of Chemistry journal article supplement (doi:10.1039/c0ce00517g), 2011-01-01

# Coordination polymers based on the octamolybdate and flexible bis(triazole) ligands with different spacer lengths

**Xiao-Di Du<sup>a</sup>, Cheng-Hui Li<sup>a,b</sup>, Yuan Zhang<sup>a</sup>, Sheng Liu<sup>a</sup>, Yue Ma<sup>a</sup>, and  
Xiao-Zeng You<sup>a,b,\*</sup>**

## **Electronic supplementary information**

---

\* *a*State Key Laboratory of Coordination Chemistry, School of Chemistry and Chemical Engineering, Nanjing National Laboratory of Microstructures, Nanjing University, Nanjing 210093, People's Republic of China.

*b*Academician Work Station of Changzhou Trina Solar Energy Co., Ltd., Changzhou 213022, Jiangsu Province, P. R. China.

E-mail: youxz@nju.edu.cn; Tel: +86-25-83593522

**Table S1** Selected bond lengths (Å) and angles (°) for complexes **1–3**.

| <b>1</b>           |           |                    |           |
|--------------------|-----------|--------------------|-----------|
| Cu(1)-N(1)         | 1.964(10) | Cu(1)-N(10a)       | 1.987(10) |
| Cu(1)-N(7)         | 1.999(10) | Cu(1)-N(4b)        | 2.015(9)  |
| Cu(1)-O(1)         | 2.413(9)  | Mo(1)-O(2)         | 1.691(9)  |
| Mo(1)-O(1)         | 1.696(8)  | Mo(1)-O(9)         | 1.915(8)  |
| Mo(1)-O(10c)       | 1.921(8)  | Mo(1)-O(8)         | 2.264(8)  |
| Mo(1)-O(13)        | 2.362(7)  | Mo(2)-O(3)         | 1.679(8)  |
| Mo(2)-O(8)         | 1.735(8)  | Mo(2)-O(11)        | 1.950(7)  |
| Mo(2)-O(12)        | 1.965(7)  | Mo(2)-O(13c)       | 2.137(7)  |
| Mo(2)-O(13)        | 2.383(7)  | Mo(3)-O(4)         | 1.684(9)  |
| Mo(3)-O(5)         | 1.687(8)  | Mo(3)-O(9)         | 1.884(8)  |
| Mo(3)-O(11c)       | 1.971(7)  | Mo(3)-O(12)        | 2.340(7)  |
| Mo(3)-O(13)        | 2.388(7)  | Mo(4)-O(7)         | 1.692(8)  |
| Mo(4)-O(6)         | 1.699(8)  | Mo(4)-O(10)        | 1.878(8)  |
| Mo(4)-O(12)        | 1.974(7)  | Mo(4)-O(13c)       | 2.335(7)  |
| Mo(4)-O(11c)       | 2.344(8)  | N(1)-Cu(1)-N(10a)  | 91.9(4)   |
| N(1)-Cu(1)-N(7)    | 90.8(4)   | N(10a)-Cu(1)-N(7)  | 175.0(4)  |
| N(1)-Cu(1)-N(4b)   | 173.0(4)  | N(10a)-Cu(1)-N(4b) | 90.4(4)   |
| N(7)-Cu(1)-N(4b)   | 87.5(4)   | N(1)-Cu(1)-O(1)    | 99.9(4)   |
| N(10a)-Cu(1)-O(1)  | 90.8(4)   | N(7)-Cu(1)-O(1)    | 84.6(4)   |
| N(4b)-Cu(1)-O(1)   | 86.7(4)   | O(2)-Mo(1)-O(1)    | 104.7(5)  |
| O(2)-Mo(1)-O(9)    | 99.2(4)   | O(1)-Mo(1)-O(9)    | 102.2(4)  |
| O(2)-Mo(1)-O(10c)  | 97.5(4)   | O(1)-Mo(1)-O(10c)  | 100.4(4)  |
| O(9)-Mo(1)-O(10c)  | 147.3(3)  | O(2)-Mo(1)-O(8)    | 165.1(4)  |
| O(1)-Mo(1)-O(8)    | 90.1(4)   | O(9)-Mo(1)-O(8)    | 78.5(3)   |
| O(10c)-Mo(1)-O(8)  | 78.2(3)   | O(2)-Mo(1)-O(13)   | 94.6(4)   |
| O(1)-Mo(1)-O(13)   | 160.6(4)  | O(9)-Mo(1)-O(13)   | 76.1(3)   |
| O(10c)-Mo(1)-O(13) | 74.7(3)   | O(8)-Mo(1)-O(13)   | 70.5(3)   |
| O(3)-Mo(2)-O(8)    | 105.7(4)  | O(3)-Mo(2)-O(11)   | 101.6(4)  |
| O(8)-Mo(2)-O(11)   | 97.0(3)   | O(3)-Mo(2)-O(12)   | 101.5(4)  |
| O(8)-Mo(2)-O(12)   | 95.7(3)   | O(11)-Mo(2)-O(12)  | 149.5(3)  |
| O(3)-Mo(2)-O(13c)  | 98.5(4)   | O(8)-Mo(2)-O(13c)  | 155.7(3)  |
| O(11)-Mo(2)-O(13c) | 79.1(3)   | O(12)-Mo(2)-O(13c) | 77.9(3)   |
| O(3)-Mo(2)-O(13)   | 175.1(4)  | O(8)-Mo(2)-O(13)   | 79.2(3)   |
| O(11)-Mo(2)-O(13)  | 77.9(3)   | O(12)-Mo(2)-O(13)  | 77.4(3)   |
| O(13c)-Mo(2)-O(13) | 76.5(3)   | O(4)-Mo(3)-O(5)    | 105.2(5)  |
| O(4)-Mo(3)-O(9)    | 102.0(4)  | O(5)-Mo(3)-O(9)    | 101.1(4)  |
| O(4)-Mo(3)-O(11c)  | 96.8(4)   | O(5)-Mo(3)-O(11c)  | 102.6(4)  |
| O(9)-Mo(3)-O(11c)  | 144.5(3)  | O(4)-Mo(3)-O(12)   | 162.8(4)  |
| O(5)-Mo(3)-O(12)   | 89.6(4)   | O(9)-Mo(3)-O(12)   | 83.2(3)   |
| O(11c)-Mo(3)-O(12) | 71.0(3)   | O(4)-Mo(3)-O(13)   | 94.4(4)   |

|                     |          |                    |          |
|---------------------|----------|--------------------|----------|
| O(5)-Mo(3)-O(13)    | 160.3(4) | O(9)-Mo(3)-O(13)   | 76.0(3)  |
| O(11c)-Mo(3)-O(13)  | 72.8(3)  | O(12)-Mo(3)-O(13)  | 70.8(2)  |
| O(7)-Mo(4)-O(6)     | 104.5(4) | O(7)-Mo(4)-O(10)   | 101.4(4) |
| O(6)-Mo(4)-O(10)    | 101.3(4) | O(7)-Mo(4)-O(12)   | 101.7(4) |
| O(6)-Mo(4)-O(12)    | 97.7(4)  | O(10)-Mo(4)-O(12)  | 145.1(3) |
| O(7)-Mo(4)-O(13c)   | 159.6(3) | O(6)-Mo(4)-O(13c)  | 95.8(4)  |
| O(10)-Mo(4)-O(13c)  | 76.1(3)  | O(12)-Mo(4)-O(13c) | 73.1(3)  |
| O(7)-Mo(4)-O(11c)   | 87.8(3)  | O(6)-Mo(4)-O(11c)  | 165.0(4) |
| O(10)-Mo(4)-O(11c)  | 84.3(3)  | O(12)-Mo(4)-O(11c) | 70.9(3)  |
| O(13c)-Mo(4)-O(11c) | 71.8(3)  |                    |          |

2

|                     |            |                   |            |
|---------------------|------------|-------------------|------------|
| Cu(1)-N(3)          | 1.969(5)   | Cu(1)-N(9)        | 1.975(5)   |
| Cu(1)-O(14)         | 1.985(5)   | Cu(1)-N(6a)       | 1.992(5)   |
| Cu(1)-O(1)          | 2.348(4)   | Mo(1)-O(1)        | 1.706(4)   |
| Mo(1)-O(8)          | 1.739(4)   | Mo(1)-O(12)       | 1.823(4)   |
| Mo(1)-O(13)         | 1.890(4)   | Mo(1)-O(11)       | 2.494(4)   |
| Mo(2)-O(3)          | 1.694(5)   | Mo(2)-O(2)        | 1.701(5)   |
| Mo(2)-O(9)          | 1.888(4)   | Mo(2)-O(11b)      | 1.995(4)   |
| Mo(2)-O(13b)        | 2.232(4)   | Mo(2)-O(8)        | 2.368(4)   |
| Mo(3)-O(4)          | 1.692(5)   | Mo(3)-O(5)        | 1.705(4)   |
| Mo(3)-O(9)          | 1.939(4)   | Mo(3)-O(10)       | 1.948(4)   |
| Mo(3)-O(12)         | 2.235(4)   | Mo(3)-O(13b)      | 2.347(4)   |
| Mo(4)-O(7)          | 1.696(5)   | Mo(4)-O(6)        | 1.699(4)   |
| Mo(4)-O(10)         | 1.848(4)   | Mo(4)-O(11)       | 1.864(4)   |
| Mo(4)-O(12)         | 2.506(4)   | N(3)-Cu(1)-N(9)   | 171.5(2)   |
| N(3)-Cu(1)-O(14)    | 88.7(2)    | N(9)-Cu(1)-O(14)  | 88.1(2)    |
| N(3)-Cu(1)-N(6a)    | 92.7(2)    | N(9)-Cu(1)-N(6a)  | 89.0(2)    |
| O(14)-Cu(1)-N(6a)   | 168.7(2)   | N(3)-Cu(1)-O(1)   | 95.07(19)  |
| N(9)-Cu(1)-O(1)     | 93.14(19)  | O(14)-Cu(1)-O(1)  | 98.4(2)    |
| N(6a)-Cu(1)-O(1)    | 92.65(19)  | O(1)-Mo(1)-O(8)   | 105.7(2)   |
| O(1)-Mo(1)-O(12)    | 105.7(2)   | O(8)-Mo(1)-O(12)  | 105.20(19) |
| O(1)-Mo(1)-O(13)    | 105.26(19) | O(8)-Mo(1)-O(13)  | 102.73(18) |
| O(12)-Mo(1)-O(13)   | 130.19(18) | O(1)-Mo(1)-O(11)  | 93.25(19)  |
| O(8)-Mo(1)-O(11)    | 160.70(18) | O(12)-Mo(1)-O(11) | 72.03(16)  |
| O(13)-Mo(1)-O(11)   | 68.14(15)  | O(3)-Mo(2)-O(2)   | 105.2(2)   |
| O(3)-Mo(2)-O(9)     | 98.4(2)    | O(2)-Mo(2)-O(9)   | 103.3(2)   |
| O(3)-Mo(2)-O(11b)   | 93.6(2)    | O(2)-Mo(2)-O(11b) | 102.8(2)   |
| O(9)-Mo(2)-O(11b)   | 147.18(18) | O(3)-Mo(2)-O(13b) | 96.7(2)    |
| O(2)-Mo(2)-O(13b)   | 157.9(2)   | O(9)-Mo(2)-O(13b) | 75.82(16)  |
| O(11b)-Mo(2)-O(13b) | 72.48(16)  | O(3)-Mo(2)-O(8)   | 168.3(2)   |
| O(2)-Mo(2)-O(8)     | 86.2(2)    | O(9)-Mo(2)-O(8)   | 81.12(16)  |
| O(11b)-Mo(2)-O(8)   | 81.13(17)  | O(13b)-Mo(2)-O(8) | 71.75(14)  |
| O(4)-Mo(3)-O(5)     | 104.6(2)   | O(4)-Mo(3)-O(9)   | 98.2(2)    |
| O(5)-Mo(3)-O(9)     | 97.99(19)  | O(4)-Mo(3)-O(10)  | 96.5(2)    |

|                    |            |                    |            |
|--------------------|------------|--------------------|------------|
| O(5)-Mo(3)-O(10)   | 101.4(2)   | O(9)-Mo(3)-O(10)   | 151.82(18) |
| O(4)-Mo(3)-O(12)   | 160.80(19) | O(5)-Mo(3)-O(12)   | 94.37(19)  |
| O(9)-Mo(3)-O(12)   | 81.79(16)  | O(10)-Mo(3)-O(12)  | 76.51(17)  |
| O(4)-Mo(3)-O(13b)  | 91.58(18)  | O(5)-Mo(3)-O(13b)  | 162.3(2)   |
| O(9)-Mo(3)-O(13b)  | 72.17(15)  | O(10)-Mo(3)-O(13b) | 83.56(16)  |
| O(12)-Mo(3)-O(13b) | 70.04(14)  | O(7)-Mo(4)-O(6)    | 107.1(2)   |
| O(7)-Mo(4)-O(10)   | 104.6(2)   | O(6)-Mo(4)-O(10)   | 116.3(2)   |
| O(7)-Mo(4)-O(11)   | 103.2(2)   | O(6)-Mo(4)-O(11)   | 112.3(2)   |
| O(10)-Mo(4)-O(11)  | 112.02(19) | O(7)-Mo(4)-O(12)   | 170.48(19) |
| O(6)-Mo(4)-O(12)   | 82.28(18)  | O(10)-Mo(4)-O(12)  | 71.50(16)  |
| O(11)-Mo(4)-O(12)  | 71.17(17)  |                    |            |

3

|                    |            |                    |            |
|--------------------|------------|--------------------|------------|
| Mo(1)-O(2)         | 1.686(5)   | Mo(1)-O(1)         | 1.702(4)   |
| Mo(1)-O(9)         | 1.894(4)   | Mo(1)-O(8)         | 1.909(4)   |
| Mo(1)-O(12)        | 2.357(4)   | Mo(1)-O(13a)       | 2.372(5)   |
| Mo(2)-O(4)         | 1.684(5)   | Mo(2)-O(3)         | 1.711(4)   |
| Mo(2)-O(8)         | 1.908(4)   | Mo(2)-O(11)        | 1.916(4)   |
| Mo(2)-O(10)        | 2.292(4)   | Mo(2)-O(13a)       | 2.380(5)   |
| Mo(3)-O(5)         | 1.683(5)   | Mo(3)-O(12)        | 1.776(5)   |
| Mo(3)-O(10)        | 1.777(5)   | Mo(3)-O(13)        | 1.789(5)   |
| Mo(4)-O(6)         | 1.679(6)   | Mo(4)-O(7)         | 1.684(6)   |
| Mo(4)-O(11a)       | 1.872(4)   | Mo(4)-O(9)         | 1.888(4)   |
| Mo(4)-O(12)        | 2.507(5)   | Cu(1)-N(9)         | 1.996(5)   |
| Cu(1)-N(9b)        | 1.996(5)   | Cu(1)-N(3)         | 2.028(5)   |
| Cu(1)-N(3b)        | 2.028(5)   | Cu(1)-O(1c)        | 2.439(4)   |
| Cu(1)-O(1d)        | 2.439(4)   | Cu(2)-N(6)         | 2.000(5)   |
| Cu(2)-N(6e)        | 2.000(5)   | Cu(2)-N(12e)       | 2.006(5)   |
| Cu(2)-N(12)        | 2.006(5)   | Cu(2)-O(3e)        | 2.400(4)   |
| Cu(2)-O(3)         | 2.400(4)   | O(2)-Mo(1)-O(1)    | 103.2(2)   |
| O(2)-Mo(1)-O(9)    | 99.5(2)    | O(1)-Mo(1)-O(9)    | 101.5(2)   |
| O(2)-Mo(1)-O(8)    | 100.0(2)   | O(1)-Mo(1)-O(8)    | 100.1(2)   |
| O(9)-Mo(1)-O(8)    | 146.57(19) | O(2)-Mo(1)-O(12)   | 163.2(2)   |
| O(1)-Mo(1)-O(12)   | 93.3(2)    | O(9)-Mo(1)-O(12)   | 73.52(18)  |
| O(8)-Mo(1)-O(12)   | 80.08(17)  | O(2)-Mo(1)-O(13a)  | 88.1(2)    |
| O(1)-Mo(1)-O(13a)  | 167.8(2)   | O(9)-Mo(1)-O(13a)  | 80.75(18)  |
| O(8)-Mo(1)-O(13a)  | 73.09(17)  | O(12)-Mo(1)-O(13a) | 75.80(18)  |
| O(4)-Mo(2)-O(3)    | 104.2(2)   | O(4)-Mo(2)-O(8)    | 100.1(2)   |
| O(3)-Mo(2)-O(8)    | 100.2(2)   | O(4)-Mo(2)-O(11)   | 102.8(2)   |
| O(3)-Mo(2)-O(11)   | 96.2(2)    | O(8)-Mo(2)-O(11)   | 147.55(18) |
| O(4)-Mo(2)-O(10)   | 90.6(2)    | O(3)-Mo(2)-O(10)   | 164.5(2)   |
| O(8)-Mo(2)-O(10)   | 81.31(18)  | O(11)-Mo(2)-O(10)  | 75.73(18)  |
| O(4)-Mo(2)-O(13a)  | 165.6(2)   | O(3)-Mo(2)-O(13a)  | 89.6(2)    |
| O(8)-Mo(2)-O(13a)  | 72.91(17)  | O(11)-Mo(2)-O(13a) | 79.44(17)  |
| O(10)-Mo(2)-O(13a) | 76.00(18)  | O(5)-Mo(3)-O(12)   | 109.3(3)   |

|                    |            |                    |           |
|--------------------|------------|--------------------|-----------|
| O(5)-Mo(3)-O(10)   | 109.8(3)   | O(12)-Mo(3)-O(10)  | 110.3(2)  |
| O(5)-Mo(3)-O(13)   | 107.9(3)   | O(12)-Mo(3)-O(13)  | 110.5(2)  |
| O(10)-Mo(3)-O(13)  | 109.0(2)   | O(6)-Mo(4)-O(7)    | 106.1(3)  |
| O(6)-Mo(4)-O(11a)  | 101.9(2)   | O(7)-Mo(4)-O(11a)  | 103.3(2)  |
| O(6)-Mo(4)-O(9)    | 100.6(2)   | O(7)-Mo(4)-O(9)    | 104.9(2)  |
| O(11a)-Mo(4)-O(9)  | 137.0(2)   | O(6)-Mo(4)-O(12)   | 164.5(3)  |
| O(7)-Mo(4)-O(12)   | 88.5(2)    | O(11a)-Mo(4)-O(12) | 79.10(17) |
| O(9)-Mo(4)-O(12)   | 69.98(17)  | N(9)-Cu(1)-N(9b)   | 180.0     |
| N(9)-Cu(1)-N(3)    | 90.5(2)    | N(9b)-Cu(1)-N(3)   | 89.5(2)   |
| N(9)-Cu(1)-N(3b)   | 89.5(2)    | N(9b)-Cu(1)-N(3b)  | 90.5(2)   |
| N(3)-Cu(1)-N(3b)   | 180.00(19) | N(9)-Cu(1)-O(1c)   | 89.91(19) |
| N(9b)-Cu(1)-O(1a)  | 90.09(19)  | N(3)-Cu(1)-O(1c)   | 81.5(2)   |
| N(3b)-Cu(1)-O(1c)  | 98.5(2)    | N(9)-Cu(1)-O(1d)   | 90.09(19) |
| N(9b)-Cu(1)-O(1d)  | 89.91(19)  | N(3)-Cu(1)-O(1d)   | 98.5(2)   |
| N(3b)-Cu(1)-O(1d)  | 81.5(2)    | O(1c)-Cu(1)-O(1d)  | 180.0(2)  |
| N(6)-Cu(2)-N(6e)   | 180.0(3)   | N(6)-Cu(2)-N(12e)  | 88.3(2)   |
| N(6e)-Cu(2)-N(12e) | 91.7(2)    | N(6)-Cu(2)-N(12)   | 91.7(2)   |
| N(6e)-Cu(2)-N(12)  | 88.3(2)    | N(12e)-Cu(2)-N(12) | 180.0(5)  |
| N(6)-Cu(2)-O(3e)   | 90.08(18)  | N(6e)-Cu(2)-O(3e)  | 89.92(18) |
| N(12e)-Cu(2)-O(3e) | 89.92(19)  | N(12)-Cu(2)-O(3e)  | 90.08(19) |
| N(6)-Cu(2)-O(3)    | 89.92(18)  | N(6e)-Cu(2)-O(3)   | 90.08(18) |
| N(12e)-Cu(2)-O(3)  | 90.08(19)  | N(12)-Cu(2)-O(3)   | 89.92(19) |
| O(3e)-Cu(2)-O(3)   | 180.0      |                    |           |

---

Symmetry codes: <sup>1</sup>I: (a)  $x, y + 1, z$ ; (b)  $x - 1, y, z$ ; (c)  $-x + 2, -y + 1, -z$ ; (d)  $x + 1, y, z$ ; (e)  $x, y - 1, z$ . <sup>2</sup>I: (a)  $-x + 1/2, y + 1/2, -z + 1/2$ ; (b)  $-x + 1, -y + 2, -z$ ; (c)  $-x, -y + 2, -z + 1$ ; (d)  $-x + 1/2, y - 1/2, -z + 1/2$ . <sup>3</sup>I: (a)  $-x + 1, -y, -z$ ; (b)  $-x, -y + 1, -z$ ; (c)  $-x, -y, -z$ ; (d)  $x, y + 1, z$ ; (e)  $-x + 1, -y, -z + 1$ .

**Fig. S1** Thermogravimetric (TG) curves for **1–3**.

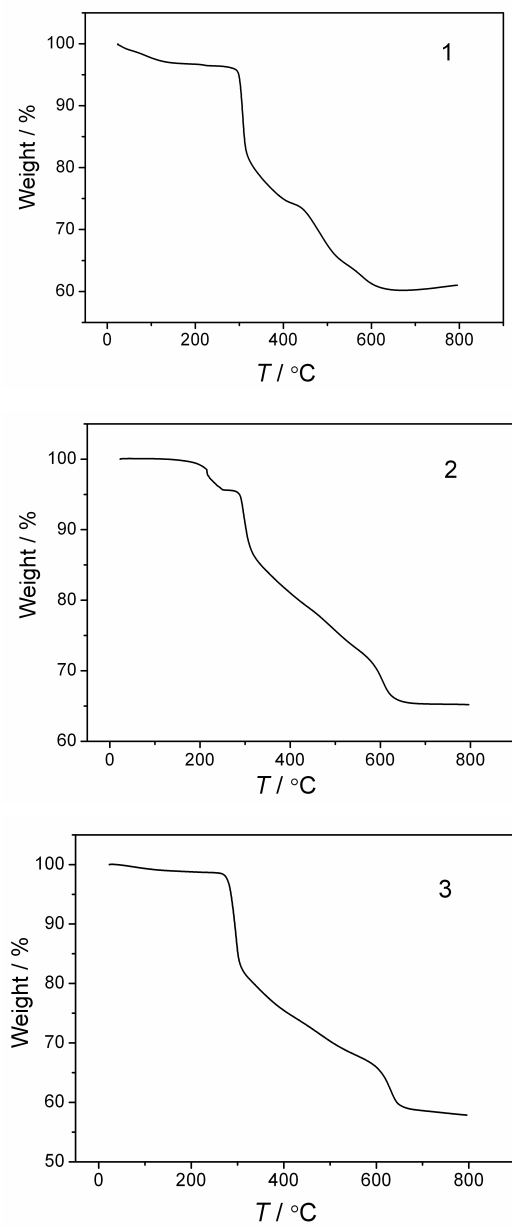

**Fig. S2** The PXRD patterns of the simulated from the single-crystal diffraction data (red) and as-synthesized (black) for **1–3**.

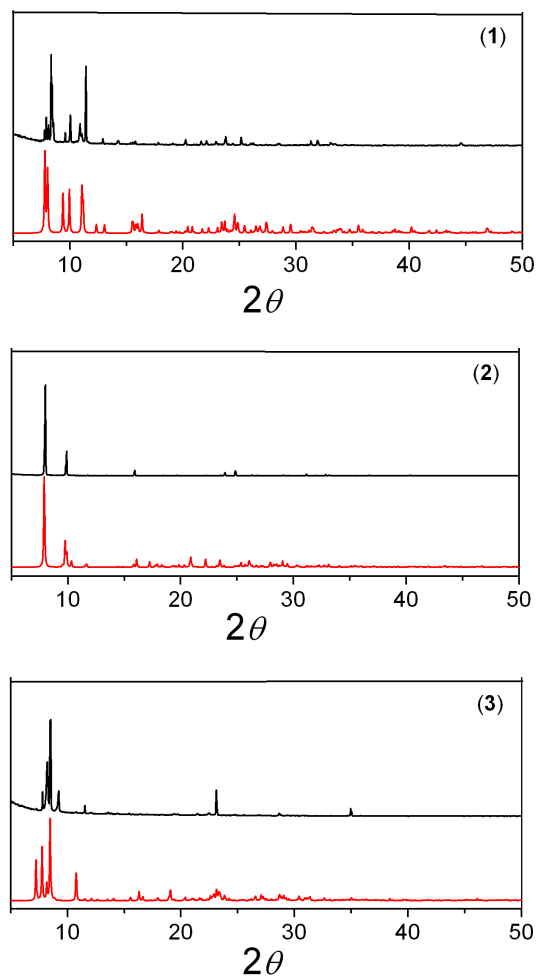

**Fig. S3** Cyclic voltammograms of the 2-CPE in 0.1 M H<sub>2</sub>SO<sub>4</sub> at different scan rates (from inner to outer: 200, 240, 280, and 320 mV·s<sup>-1</sup>).

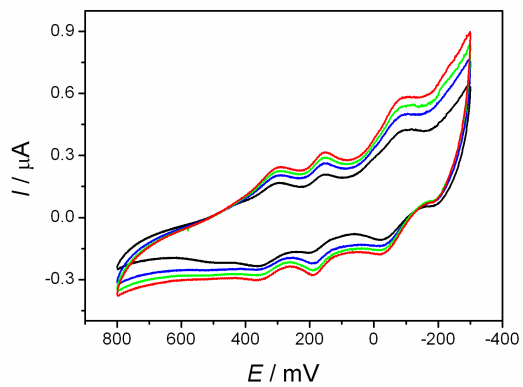



**Fig. S4** (a) The 2-CPE in 0.1 M H<sub>2</sub>SO<sub>4</sub> containing 0, 1.5, 2.0 and 2.5 mM NaBrO<sub>3</sub>. (b) The 2-CPE in 0.1 M H<sub>2</sub>SO<sub>4</sub> containing 0, 0.5, 1.0 and 3.0 mM NaNO<sub>2</sub>. Scan rate: 80 mV·s<sup>-1</sup>.

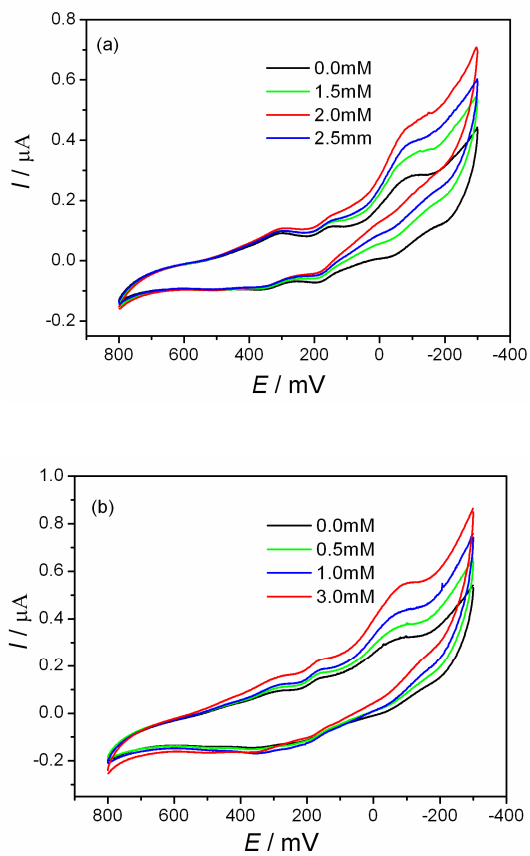

**Fig. S5** Cyclic voltammograms of the **3**-CPE in 0.1 M H<sub>2</sub>SO<sub>4</sub> at different scan rates (from inner to outer: 100, 140, 180, and 220 mV·s<sup>-1</sup>).

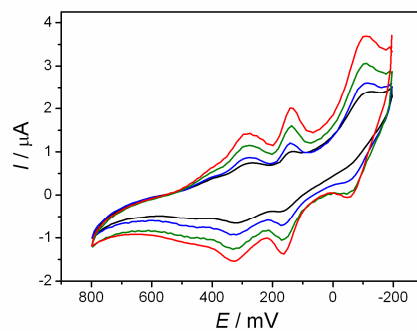

**Fig. S6** (a) The **3**-CPE in 0.1 M H<sub>2</sub>SO<sub>4</sub> containing 0, 2.0, 3.5 and 5.0 mM NaBrO<sub>3</sub>. (b) The **3**-CPE in 0.1 M H<sub>2</sub>SO<sub>4</sub> containing 0, 1.0, 3.0 and 5.0 mM NaNO<sub>2</sub>. Scan rate: 80 mV·s<sup>-1</sup>.

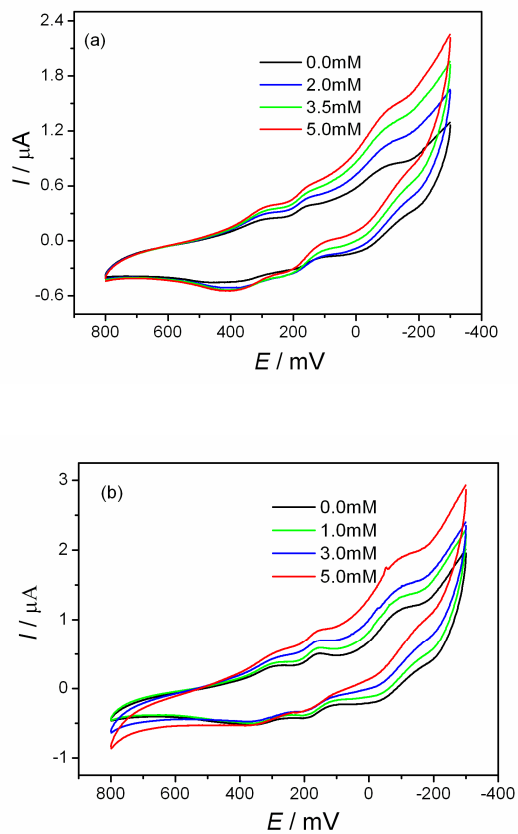

Supplement: c0ce00517g.pdf [file c0ce00517g.pdf]
